# Supplementary material
Source: PubMed Central journal article supplement (PMC9349927)
Supplement: JMV-94-5189-s002.pdf [file JMV-94-5189-s002.pdf]

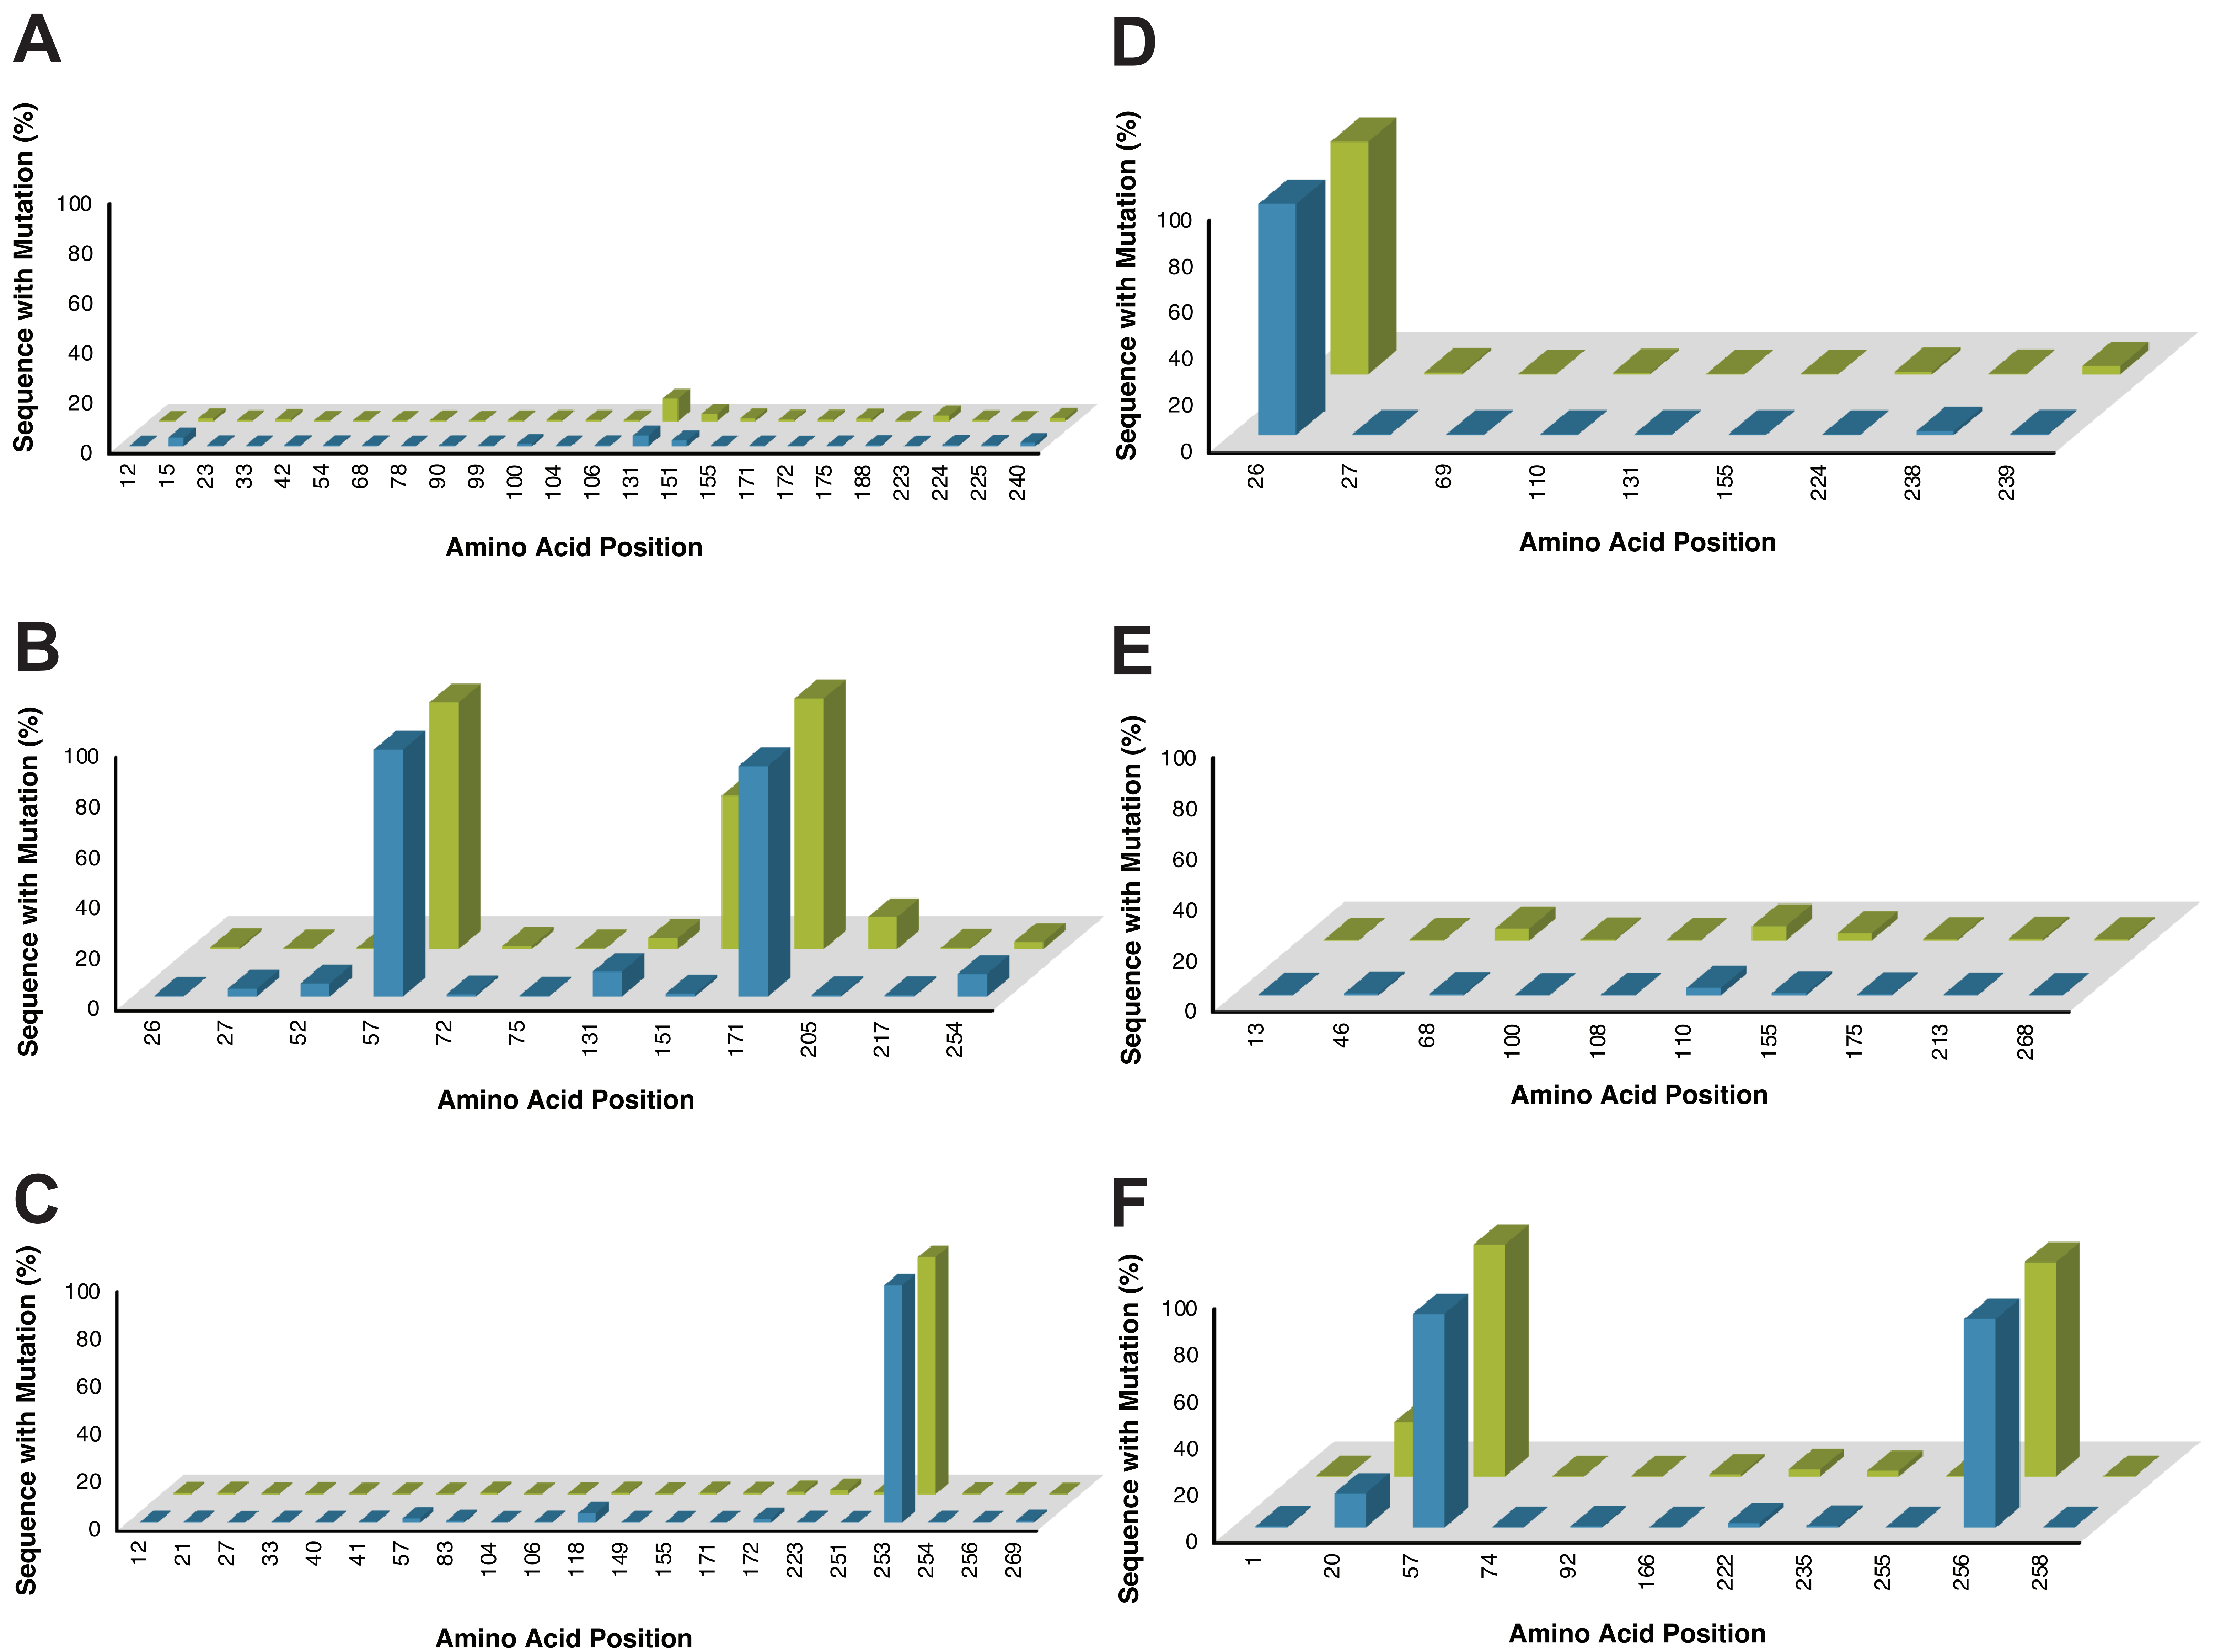

**G**

| Variant | Mutation Frequency (%) |       |       |      |
|---------|------------------------|-------|-------|------|
|         |                        | Early |       | Late |
| Alpha   | W131C                  | 4     | W131C | 8    |
|         | L15F                   | 3     | T151I | 3    |
|         | T151I                  | 2     | T223I | 2    |
|         | P240S                  | 1     | L85F  | 1    |
|         | G100C                  | 1     | L15F  | 1    |
| Beta    | Q57H                   | 100   | S171L | 100  |
|         | S171L                  | 90    | Q57H  | 100  |
|         | W131L                  | 10    | T151I | 60   |
|         | G254*                  | 9     | V90I  | 60   |
|         | L52F                   | 5     | S205T | 10   |
| Gamma   | S253P                  | 100   | S253P | 100  |
|         | I118M                  | 4     | T223I | 2    |
|         | Q57H                   | 2     | G251C | 1    |
|         | G172C                  | 1     | S216L | 1    |
|         | T269M                  | 1     | W193R | 1    |
| Delta   | S26L                   | 100   | S26L  | 100  |
|         | Q57R                   | 2     | E239Q | 3    |
|         | D238Y                  | 2     | P104S | 1    |
|         | G172R                  | 0.4   | G224C | 1    |
|         | G172C                  | 0.3   | D27Y  | 1    |
| Lambda  | A110S                  | 3     | A110S | 6    |
|         | D155Y                  | 1     | R68K  | 4    |
|         | R68K                   | 0.6   | E242V | 4    |
|         | T175I                  | 0.5   | D155Y | 3    |
|         | I118V                  | 0.5   | G172R | 2    |
| Mu      | Q57H                   | 90    | Q57H  | 100  |
|         | V256I                  | 90    | V256I | 90   |
|         | I20M                   | 20    | I20M  | 20   |
|         | D222Y                  | 2     | D222Y | 2    |
|         | K235R                  | 1     | K235R | 2    |

**Supplementary Figure 1** Frequency of ORF3a Mutations. Point mutations with frequencies greater than or equal to 0.2% and less than or equal to 100% were plotted based on the location of each mutation across the ORF3a amino acid sequences of the Alpha (A), Beta (B), Gamma (C), Delta (D), Lambda (E), and Mu (F) SARS-CoV-2 variants. The most frequent mutations were selected for each variant (G). Data shown are both from the early (■, March 01, 2021 – April 30, 2021) and late (■, July 01, 2021 – August 31, 2021) time points.

EARLY

LATE

March 01, 2021 - April 30, 2021 July 01, 2021 - August 31, 2021

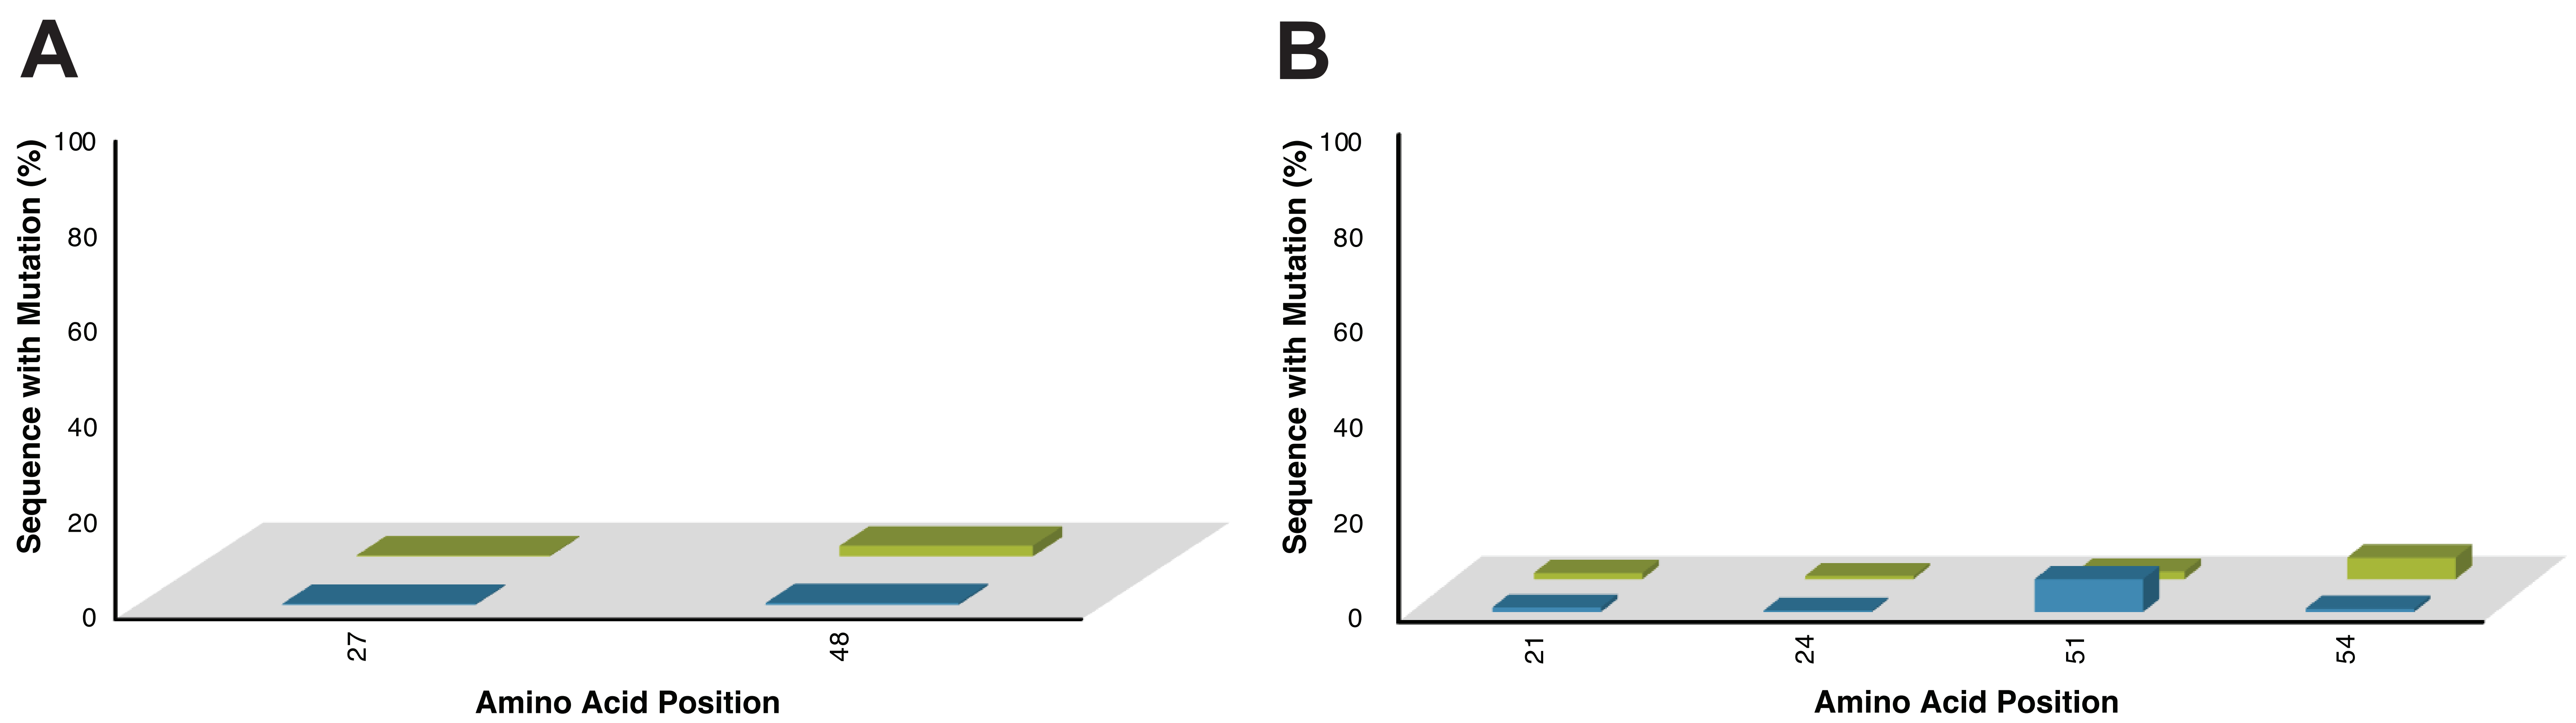

**C**

| Variant | Mutation Frequency (%) |      |      |     |
|---------|------------------------|------|------|-----|
|         | Early                  |      | Late |     |
| Alpha   | T21I                   | 0.2  | L52V | 0.2 |
|         | R20S                   | 0.2  | T21I | 0.2 |
|         | Y31H                   | 0.1  | R20S | 0.2 |
|         | W27L                   | 0.1  | W27L | 0.2 |
|         | F7L                    | 0.09 | F7Y  | 0.1 |
| Beta    | K48E                   | 0.1  | P57L | 2   |
|         | P57L                   | 0.03 | K48E | 1   |
|         | T21I                   | 0.01 | T21I | 0.4 |
|         | E54D                   | 0.01 | E54D | 0.2 |
|         |                        |      | I36T | 0.1 |
| Gamma   | P57L                   | 0.8  | T21I | 0.2 |
|         | F2S                    | 0.2  | P57L | 0.1 |
|         | W27L                   | 0.1  | W27L | 0.1 |
|         | K42N                   | 0.04 | I36T | 0.1 |
|         | R20S                   | 0.03 | S25- | 0.1 |
| Delta   | K48N                   | 0.4  | K48N | 2   |
|         | E54*                   | 0.3  | E46V | 1   |
|         | W27L                   | 0.2  | Q56R | 0.2 |
|         | R20K                   | 0.1  | W27L | 0.2 |
|         | E13D                   | 0.08 | P57L | 0.1 |
| Lambda  | A51S                   | 7    | E54* | 4   |
|         | T21I                   | 1    | A51S | 2   |
|         | E54*                   | 1    | T21I | 1   |
|         | L127F                  | 0.4  | V24I | 1   |
|         | V24I                   | 0.3  | K48N | 0.5 |
| Mu      |                        |      | Y31F | 0.2 |
|         |                        |      | L4H  | 0.1 |
|         |                        |      | V5I  | 0.1 |

**Supplementary Figure 2** Frequency of ORF6 Mutations. Point mutations with frequencies greater than or equal to 0.2% and less than or equal to 100% were plotted based on the location of each mutation across the ORF6 amino acid sequences of the Delta (A) and Lambda (B) SARS-CoV-2 variants. The most frequent mutations were selected for each variant (C). Data shown are both from the early (■, March 01, 2021 – April 30, 2021) and late (■, July 01, 2021 – August 31, 2021) time points.

**EARLY**      **LATE**  
 March 01, 2021 - April 30, 2021    July 01, 2021 - August 31, 2021

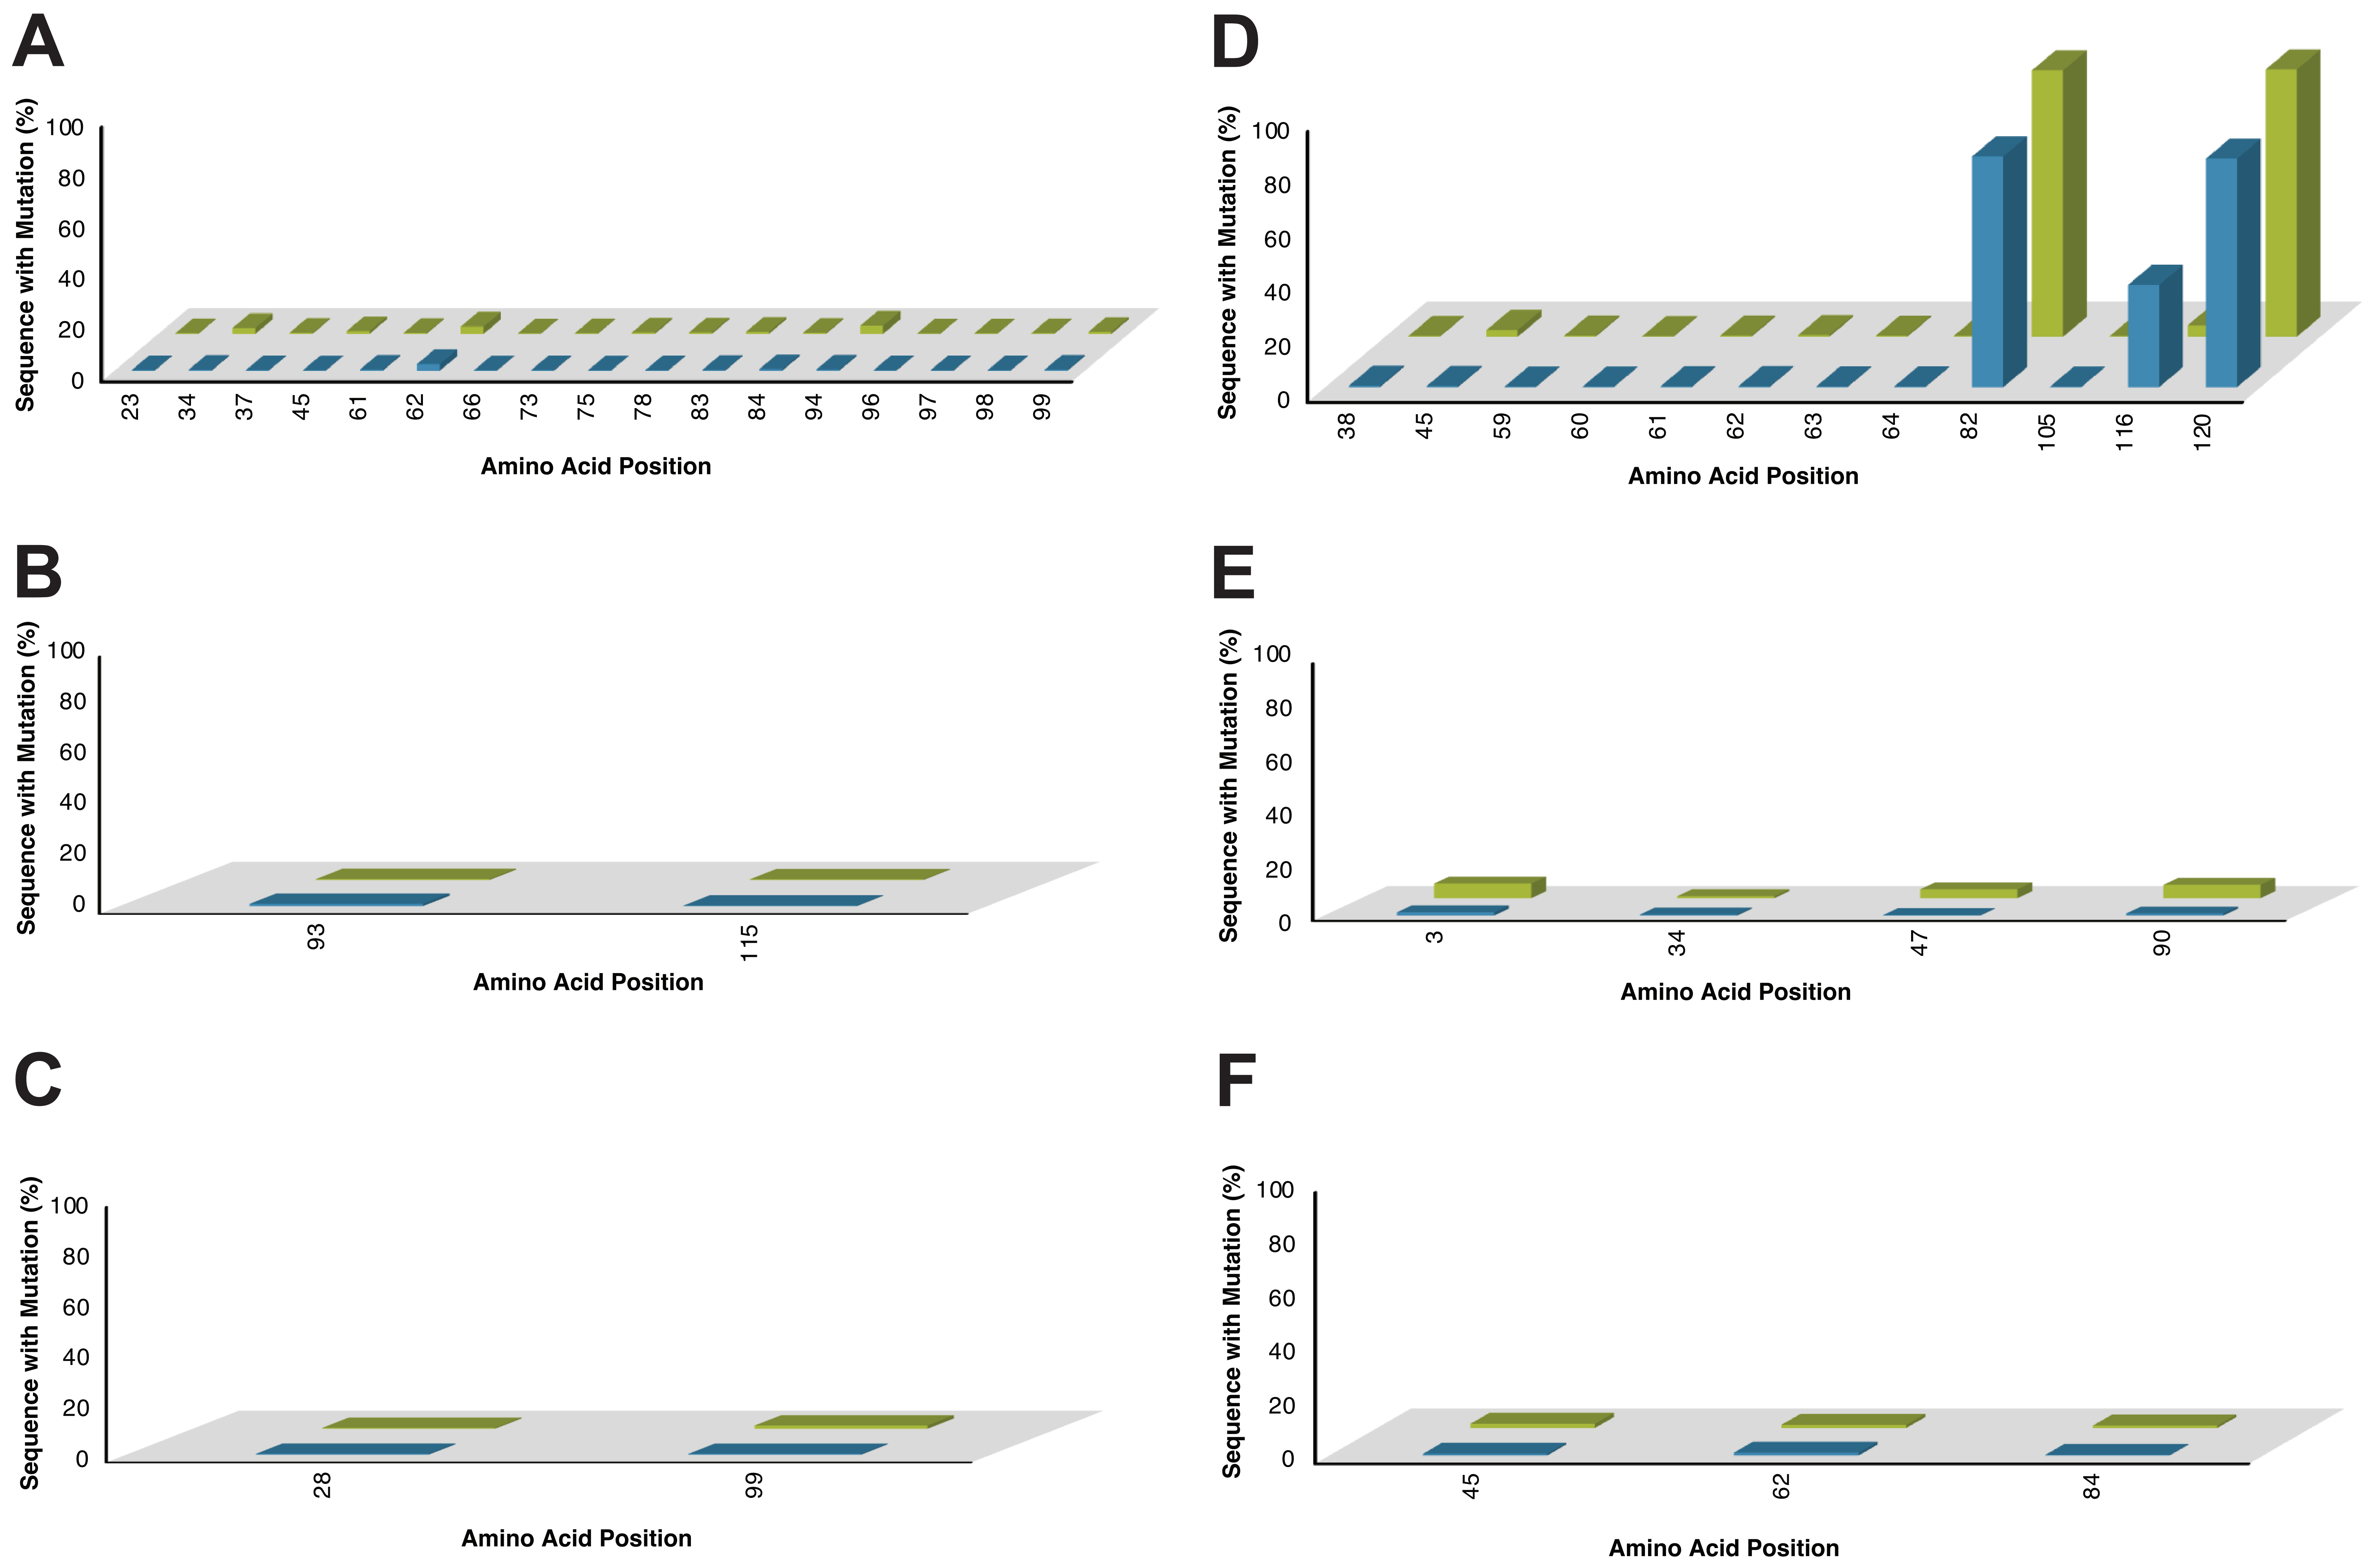

**G**

| Variant | Mutation Frequency (%) |     |       |     |
|---------|------------------------|-----|-------|-----|
|         | Early                  |     | Late  |     |
| Alpha   | Q62*                   | 2   | Q94L  | 3   |
|         | P84S                   | 0.4 | Q62*  | 3   |
|         | P84L                   | 0.3 | K119N | 1   |
|         | S83L                   | 0.3 | P34S  | 1   |
|         | P34S                   | 0.3 | P34L  | 1   |
| Beta    | F63-                   | 1.0 | V93F  | 0.4 |
|         | V93F                   | 0.9 | T115I | 0.3 |
|         | T115I                  | 0.2 | F63-  | 0.2 |
|         | Q62H                   | 0.1 | T61I  | 0.2 |
|         | L96F                   | 0.1 | H73Y  | 0.2 |
| Gamma   | V93F                   | 5   | P99L  | 0.9 |
|         | L96F                   | 0.5 | T11I  | 0.4 |
|         | T28I                   | 0.3 | T28I  | 0.4 |
|         | P99S                   | 0.3 | P99S  | 0.4 |
|         | I103-                  | 0.2 | S83L  | 0.3 |
| Delta   | V82A                   | 90  | T120I | 100 |
|         | T120I                  | 80  | V82A  | 100 |
|         | L116F                  | 40  | L116F | 4   |
|         | G38V                   | 0.4 | P45L  | 2   |
|         | P45L                   | 0.4 | V71I  | 1   |
| Lambda  | I3T                    | 1   | I3T   | 6   |
|         | Q90*                   | 0.8 | Q90*  | 5   |
|         | P34S                   | 0.4 | H47Y  | 3   |
|         | H47Y                   | 0.2 | T115I | 3   |
|         | V24F                   | 0.2 | G38V  | 1   |
| Mu      | V62L                   | 1   | P45L  | 1   |
|         | L18F                   | 0.8 | L12F  | 1   |
|         | P45L                   | 0.6 | P84S  | 0.9 |
|         | P84S                   | 0.2 | G38V  | 0.8 |
|         |                        |     | T120I | 0.7 |

**Supplementary Figure 3** Frequency of ORF7a Mutations. Point mutations with frequencies greater than or equal to 0.2% and less than or equal to 100% were plotted based on the location of each mutation across the ORF7a amino acid sequences of the Alpha (A), Beta (B), Gamma (C), Delta (D), Lambda (E), and Mu (F) SARS-CoV-2 variants. The most frequent mutations were selected for each variant (G). Data shown are both from the early (■, March 01, 2021 – April 30, 2021) and late (■, July 01, 2021 – August 31, 2021) time points.

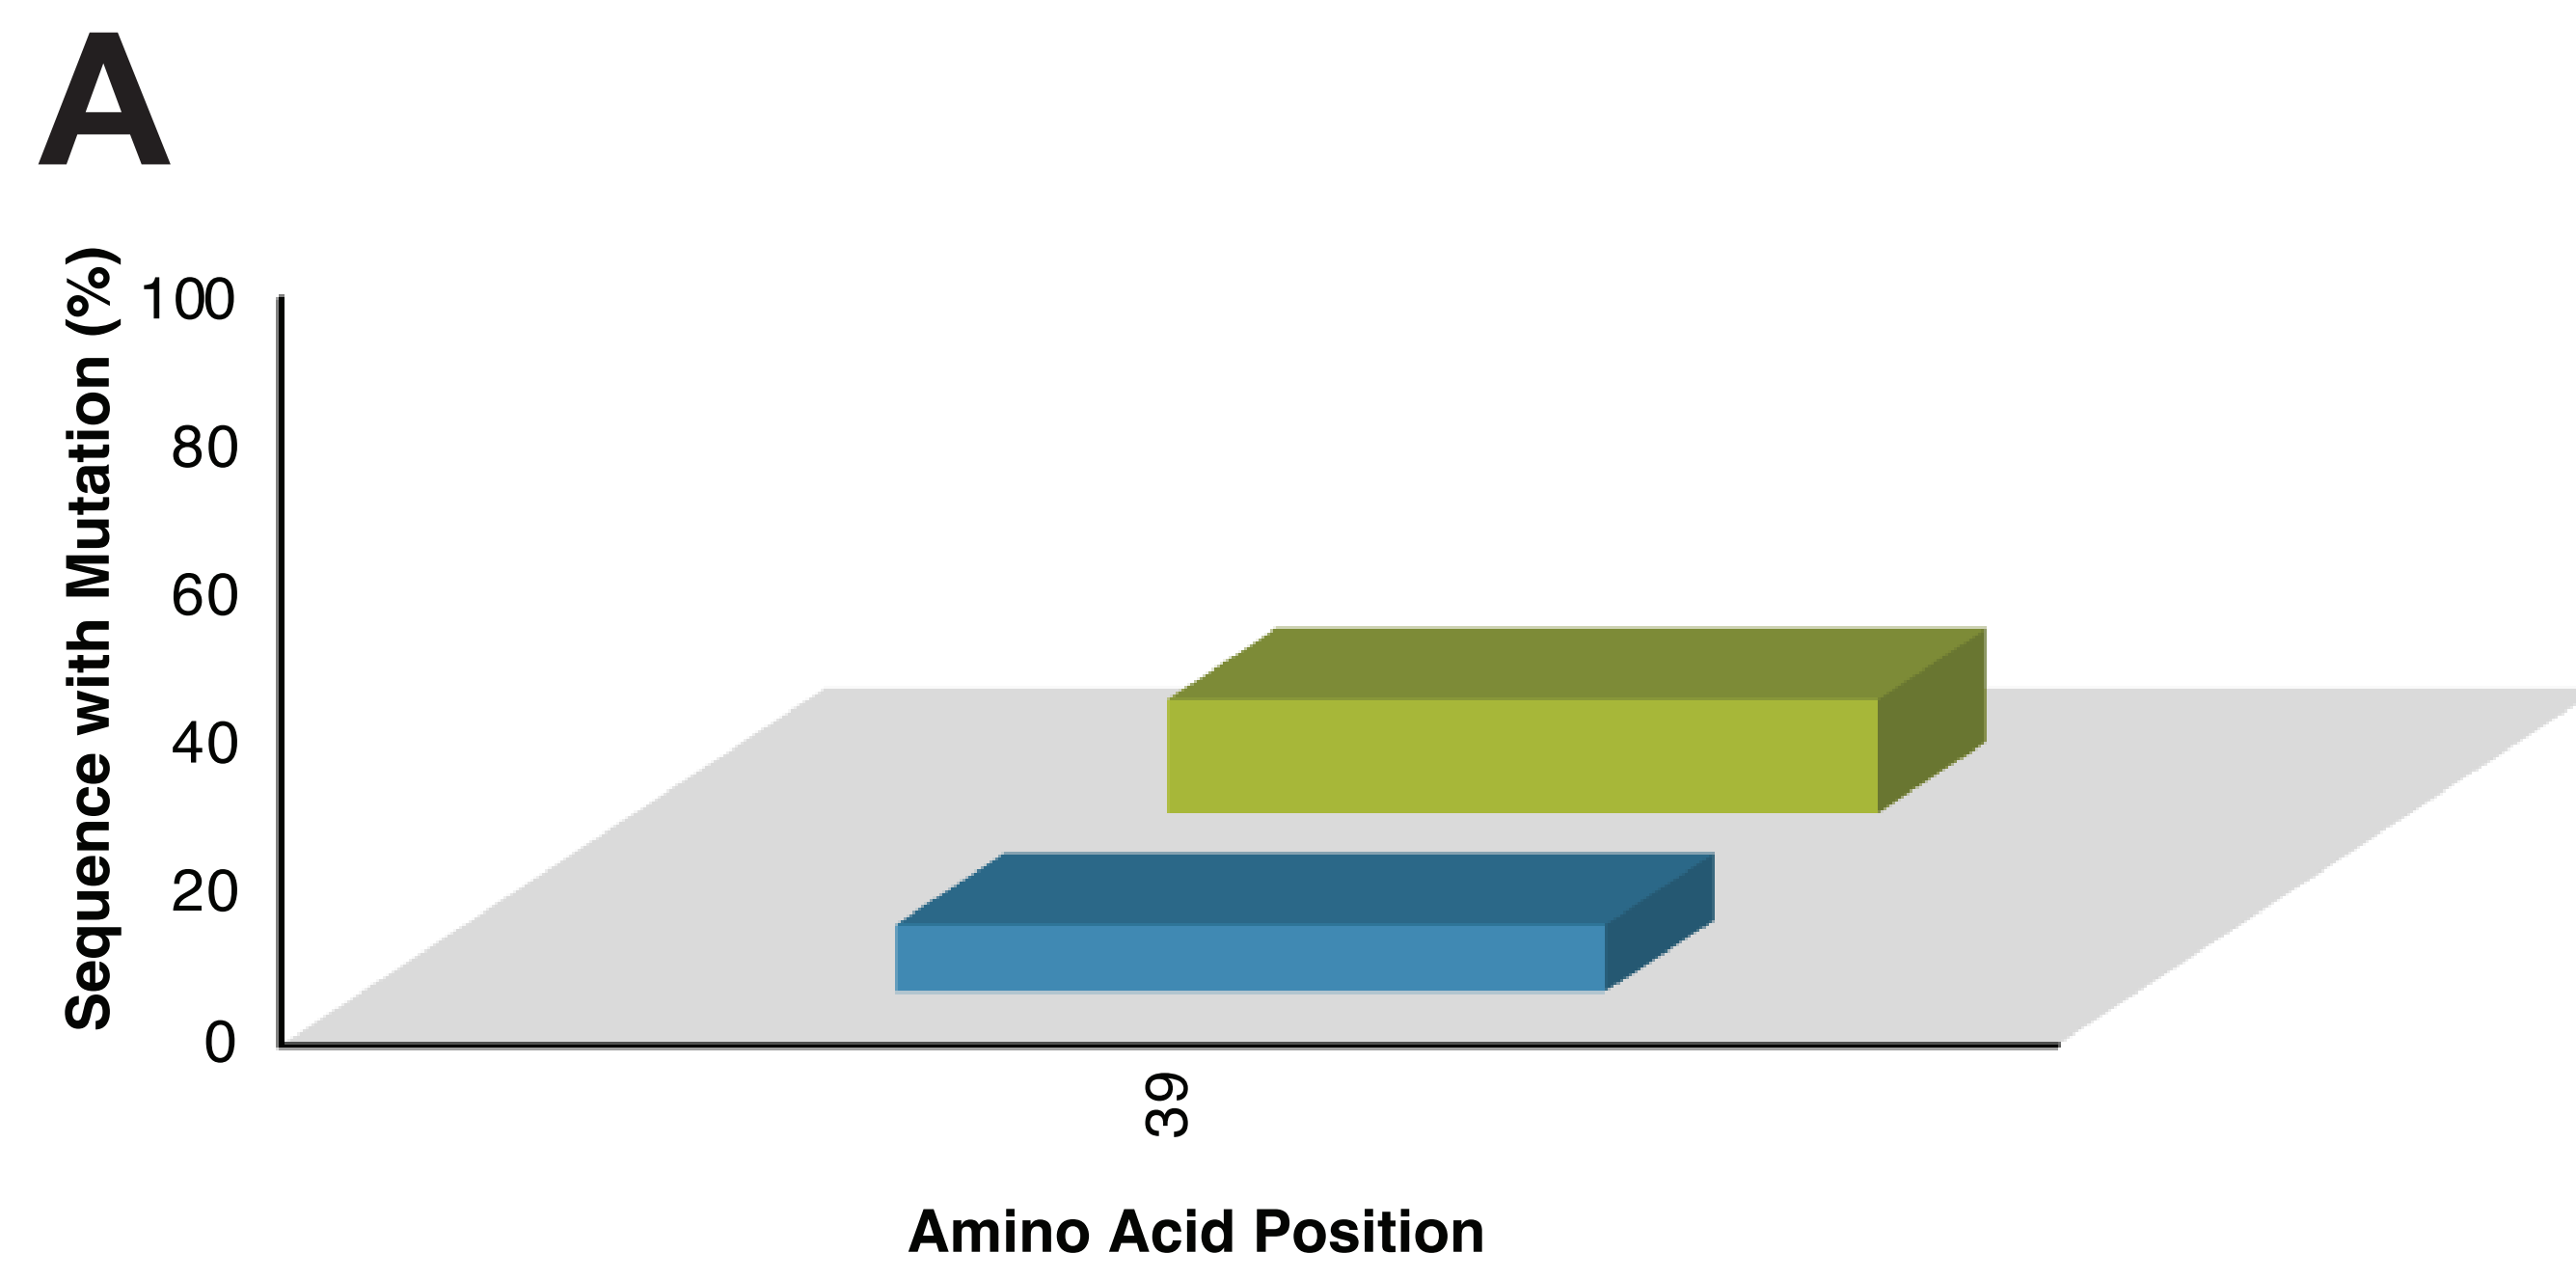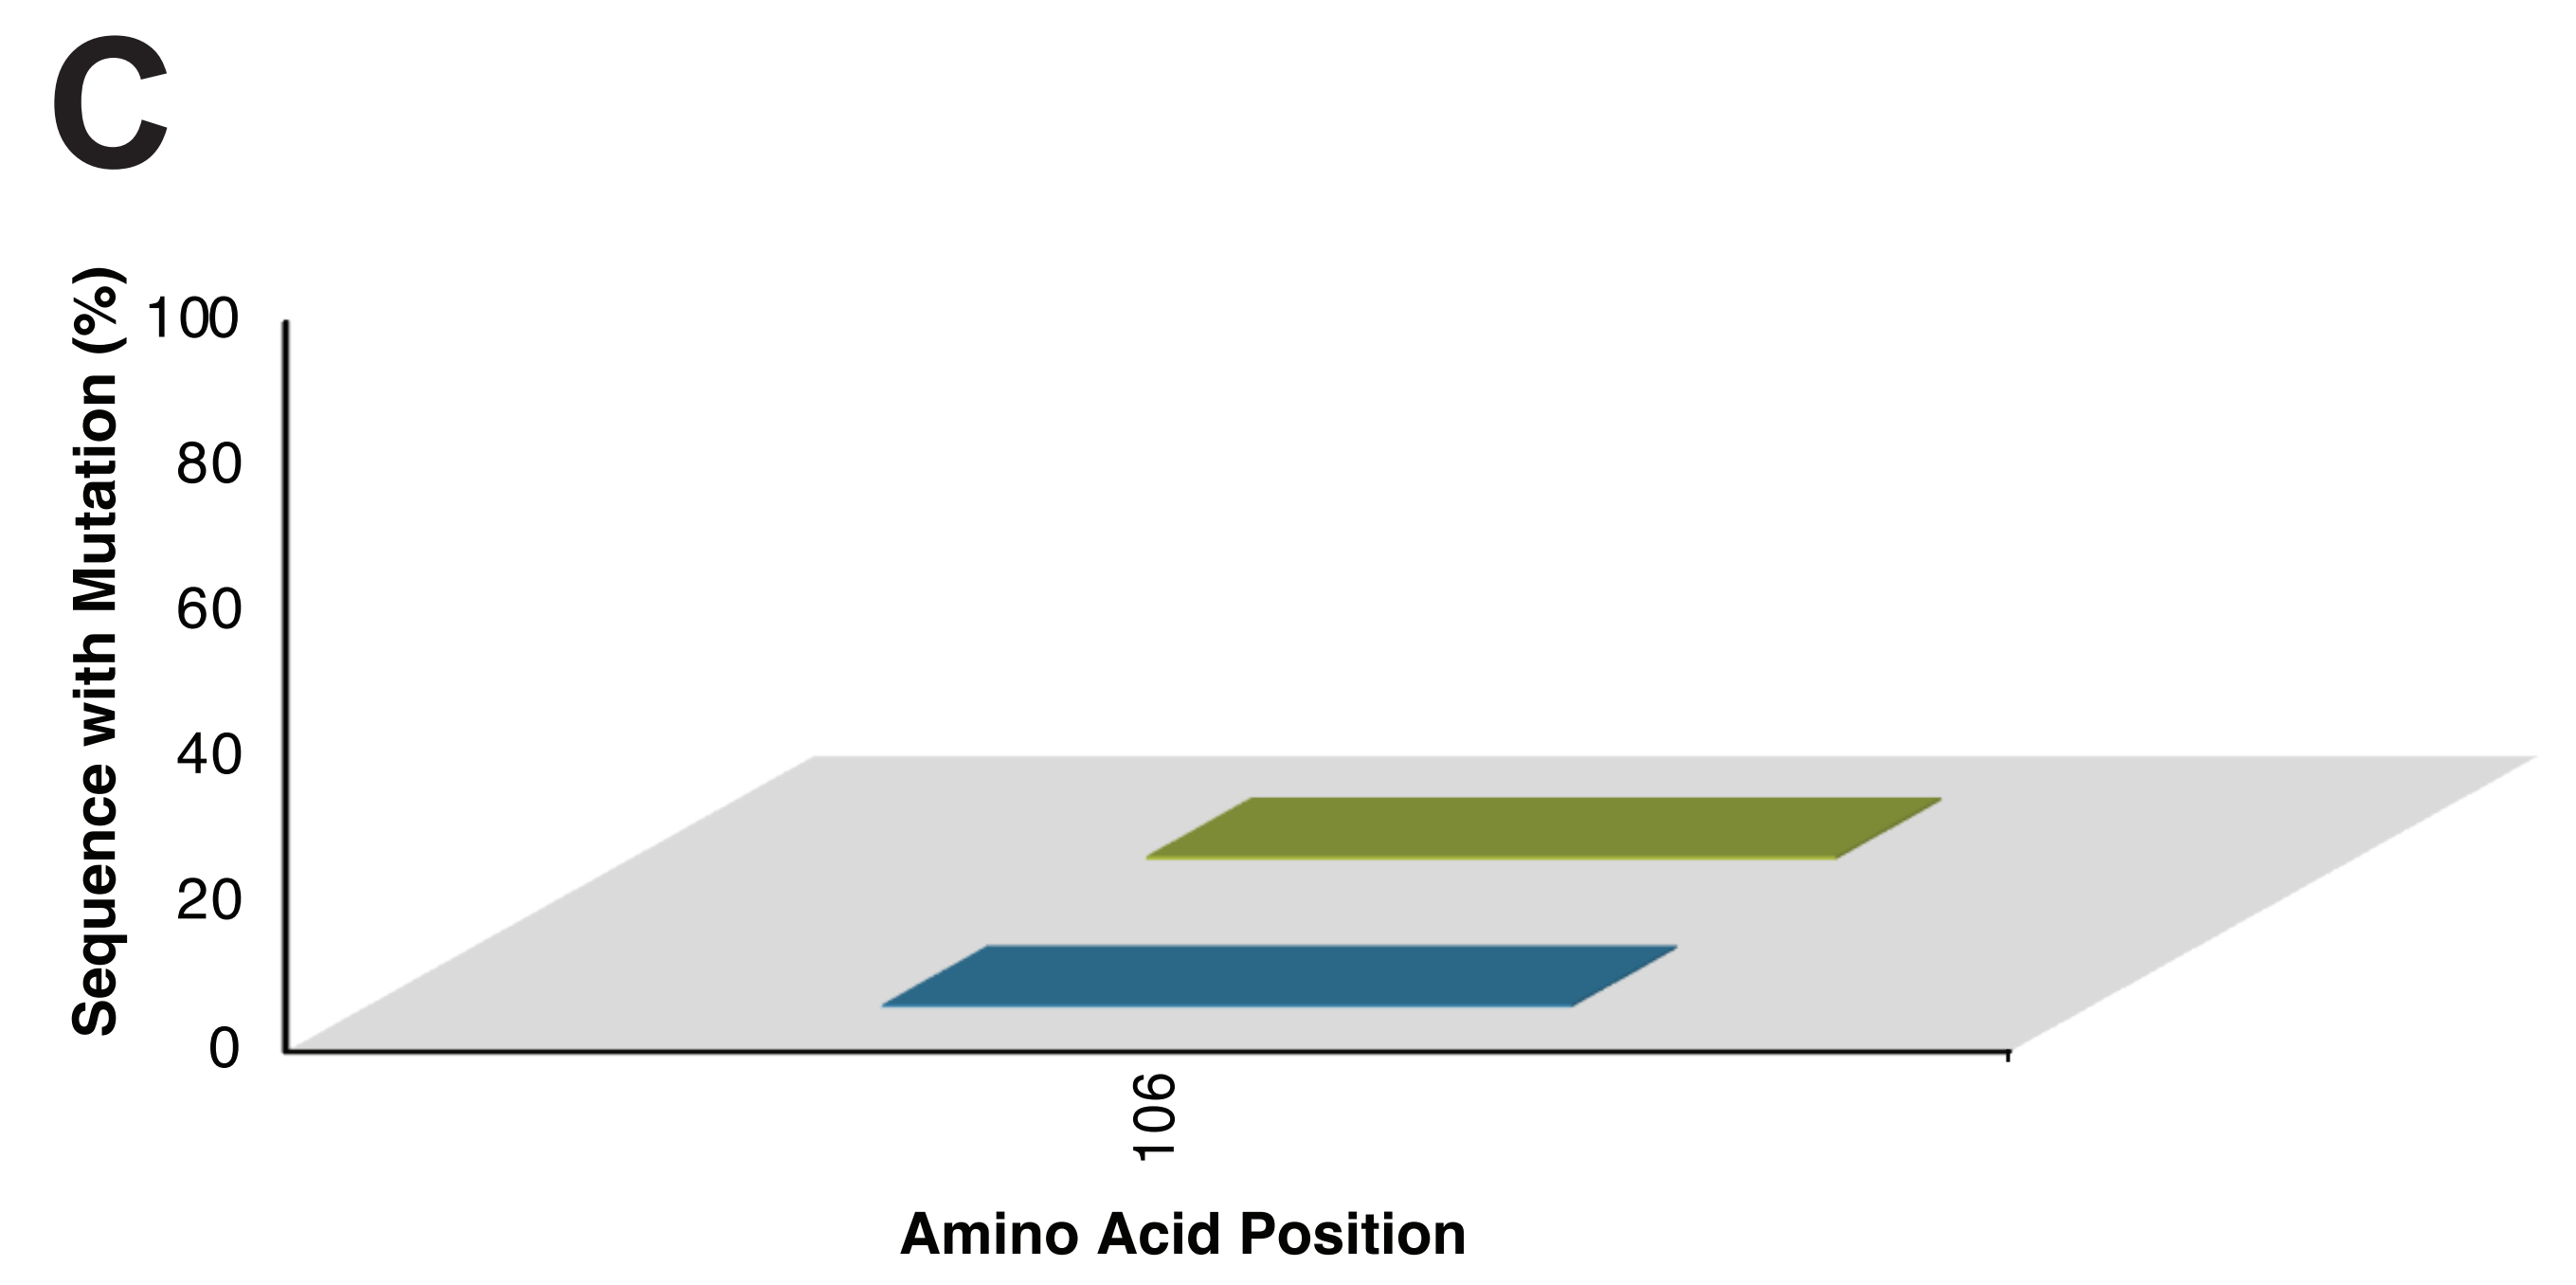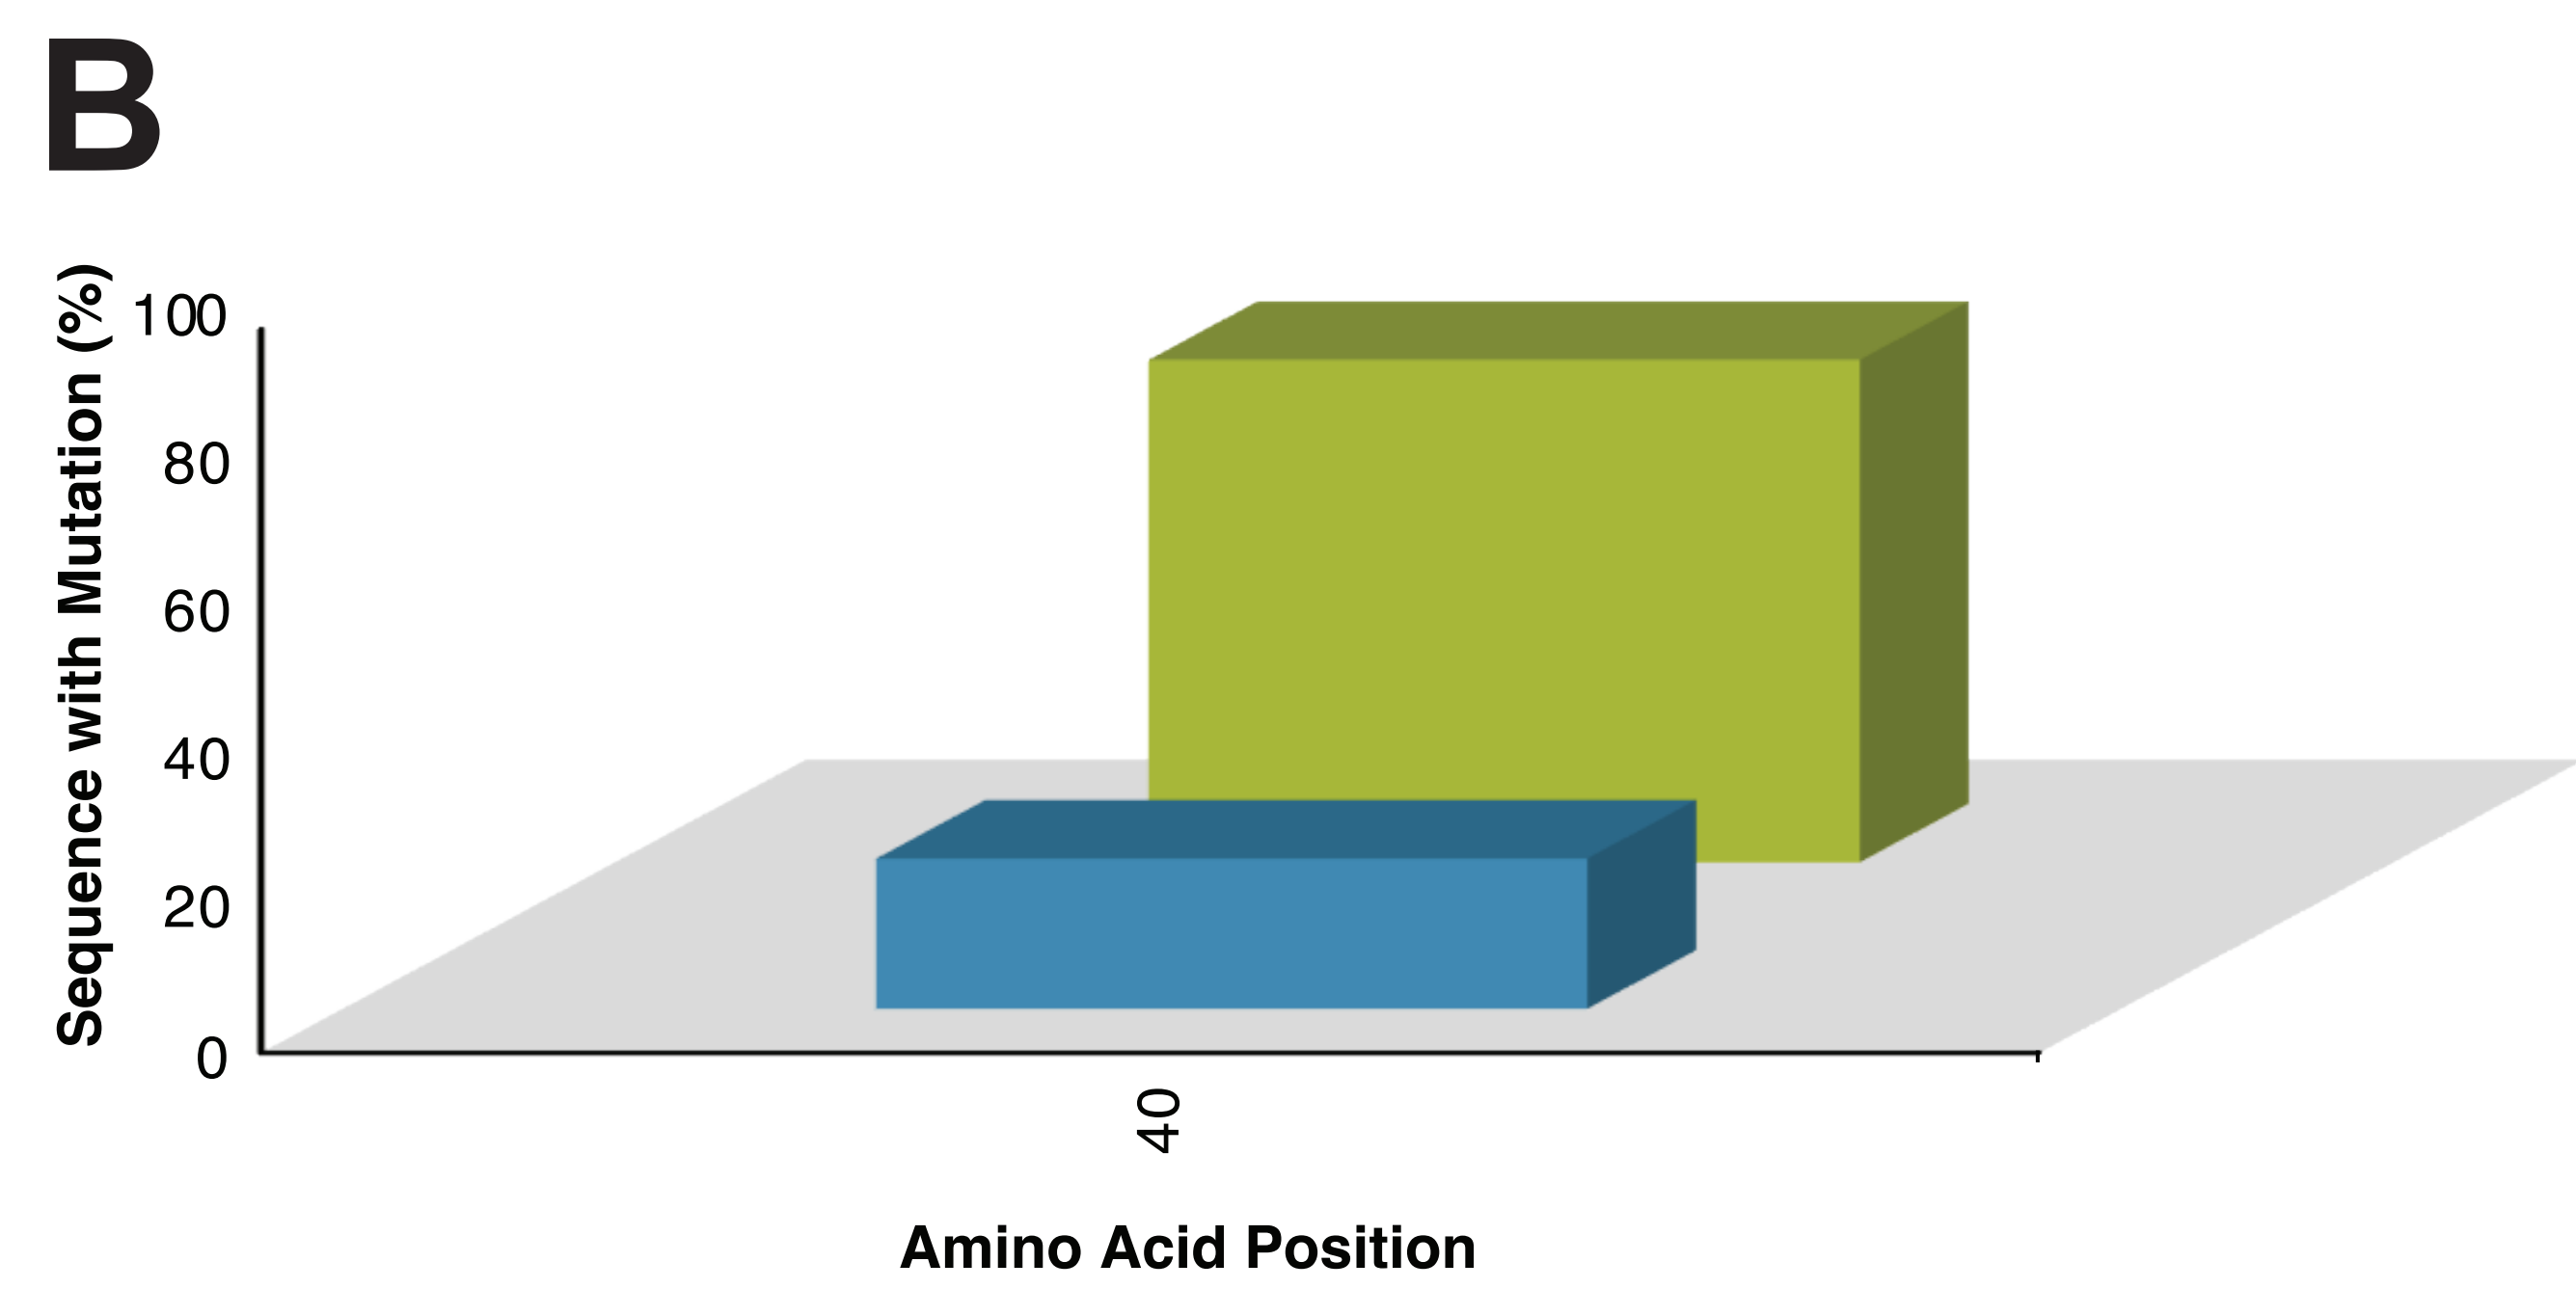

**D**

| Variant | Mutation Frequency (%) |      |       |     |
|---------|------------------------|------|-------|-----|
|         | Early                  |      | Late  |     |
| Alpha   | H42Y                   | 0.3  | A15S  | 0.4 |
|         | L32F                   | 0.2  | L4F   | 0.3 |
|         | L34M                   | 0.1  | L32F  | 0.3 |
|         | S31L                   | 0.1  | S31L  | 0.3 |
|         | W29C                   | 0.1  | I2N   | 0.2 |
| Beta    | E39*                   | 9    | E39*  | 20  |
|         | W29L                   | 0.1  | W29L  | 0.2 |
|         | T40I                   | 0.02 | T40I  | 0.2 |
|         | L4F                    | 0.01 | L4F   | 0.1 |
| Gamma   | L32F                   | 0.07 | L11F  | 0.6 |
|         | S31L                   | 0.1  | L25F  | 0.4 |
|         | M1I                    | 0.05 | L4F   | 0.2 |
|         | T40I                   | 0.05 | T40I  | 0.2 |
|         | H37N                   | 0.03 | S31L  | 0.2 |
| Delta   | T40I                   | 21   | T40I  | 70  |
|         | E39*                   | 0.3  | E33V  | 0.4 |
|         | H37Y                   | 0.1  | F13L  | 0.1 |
|         | A15S                   | 0.1  | F19L  | 0.1 |
| Lambda  |                        |      | H42Y  | 0.0 |
|         |                        |      | C41F  | 1   |
|         |                        |      | L18V  | 0.2 |
|         |                        |      | S5A   | 0.2 |
|         |                        |      | S5L   | 0.2 |
| Mu      |                        |      | S31P  | 0.2 |
|         | K21N                   | 1    | T40I  | 1.0 |
|         | E106*                  | 0.4  | E106* | 0.4 |
|         | T229I                  | 0.2  | K21N  | 0.1 |
|         |                        |      | T229I | 0.1 |
|         |                        | I27T | 0.1   |     |

**Supplementary Figure 4** Frequency of ORF7b Mutations. Point mutations with frequencies greater than or equal to 0.2% and less than or equal to 100% were plotted based on the location of each mutation across the ORF6 amino acid sequences of the Beta (A), Delta (B), and Mu (C) SARS-CoV-2 variants. The most frequent mutations were selected for each variant (D). Data shown are both from the early (■, March 01, 2021 – April 30, 2021) and late (■, July 01, 2021 – August 31, 2021) time points.

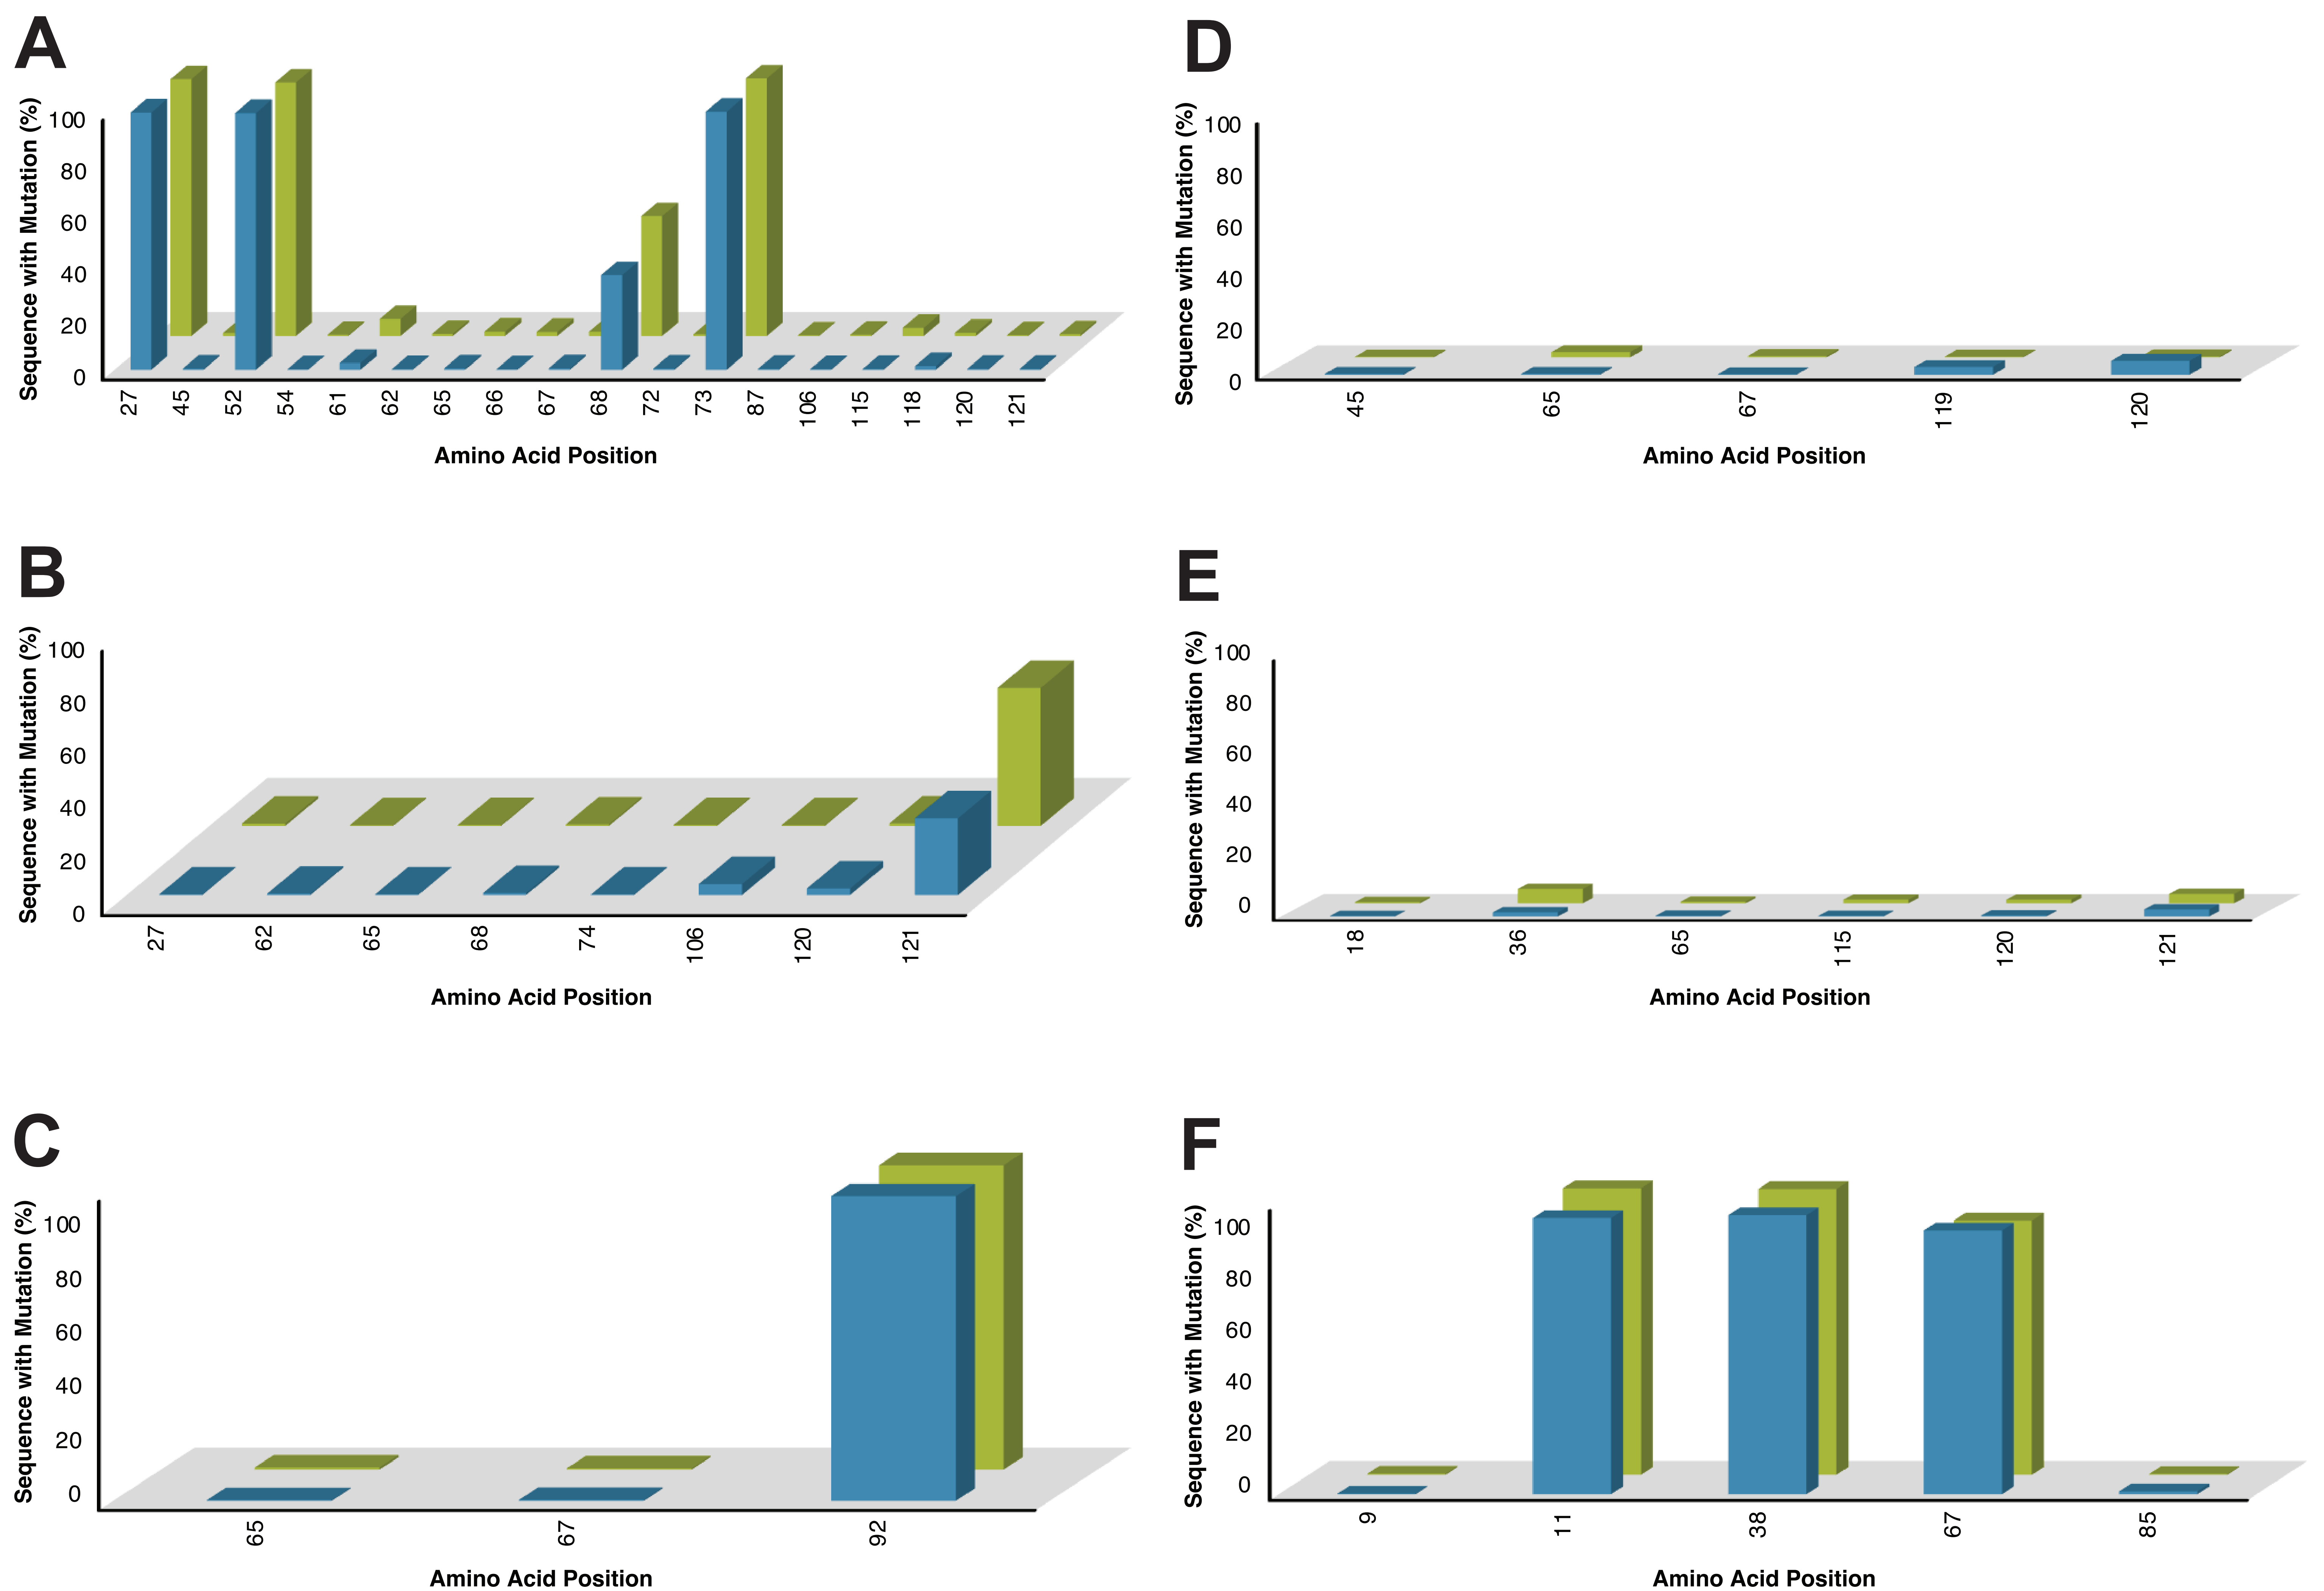

**G**

| Variant | Mutation Frequency (%) |       |       |      |
|---------|------------------------|-------|-------|------|
|         |                        | Early |       | Late |
| Alpha   | Y73C                   | 100   | Y73C  | 100  |
|         | Q27*                   | 100   | Q27*  | 100  |
|         | R52I                   | 100   | R52I  | 100  |
|         | K68*                   | 40    | K68*  | 43   |
|         | C61F                   | 3     | C61F  | 7    |
| Beta    | I121L                  | 30    | I121L | 50   |
|         | E106*                  | 4     | P93H  | 3    |
|         | F120V                  | 2     | W45L  | 3    |
|         | P38S                   | 0.8   | F120V | 1.0  |
|         | K68E                   | 0.8   | Q27*  | 0.9  |
| Gamma   | E92K                   | 100   | E92K  | 100  |
|         | R52I                   | 0.4   | G8*   | 0.6  |
|         | S67F                   | 0.3   | A65V  | 0.4  |
|         | A65V                   | 0.2   | S67F  | 0.4  |
|         | Y73C                   | 0.1   | Q72H  | 0.3  |
| Delta   | F120L                  | 5     | A65S  | 2    |
|         | D119V                  | 3     | L60F  | 2    |
|         | G8V                    | 2     | F86-  | 0.5  |
|         | I121L                  | 0.3   | T87S  | 0.5  |
|         | E106*                  | 0.2   | S67F  | 0.5  |
| Lambda  | I121L                  | 3     | P36L  | 5    |
|         | P36L                   | 2     | I121L | 4    |
|         | L242F                  | 1     | H17Y  | 2    |
|         | F120V                  | 0.4   | G66D  | 2    |
|         | A65V                   | 0.3   | F120V | 1    |
| Mu      | P38S                   | 100   | T11K  | 100  |
|         | T11K                   | 100   | P38S  | 100  |
|         | S67F                   | 90    | S67F  | 90   |
|         | L85F                   | 1     | R52I  | 4    |
|         | I9T                    | 0.2   | E106Q | 1    |

**Supplementary Figure 5** Frequency of ORF8 Mutations. Point mutations with frequencies greater than or equal to 0.2% and less than or equal to 100% were plotted based on the location of each mutation across the ORF8 amino acid sequences of the Alpha (A), Beta (B), Gamma (C), Delta (D), Lambda (E), and Mu (F) SARS-CoV-2 variants. The most frequent mutations were selected for each variant (G). Data shown are both from the early (■, March 01, 2021 – April 30, 2021) and late (■, July 01, 2021 – August 31, 2021) time points.

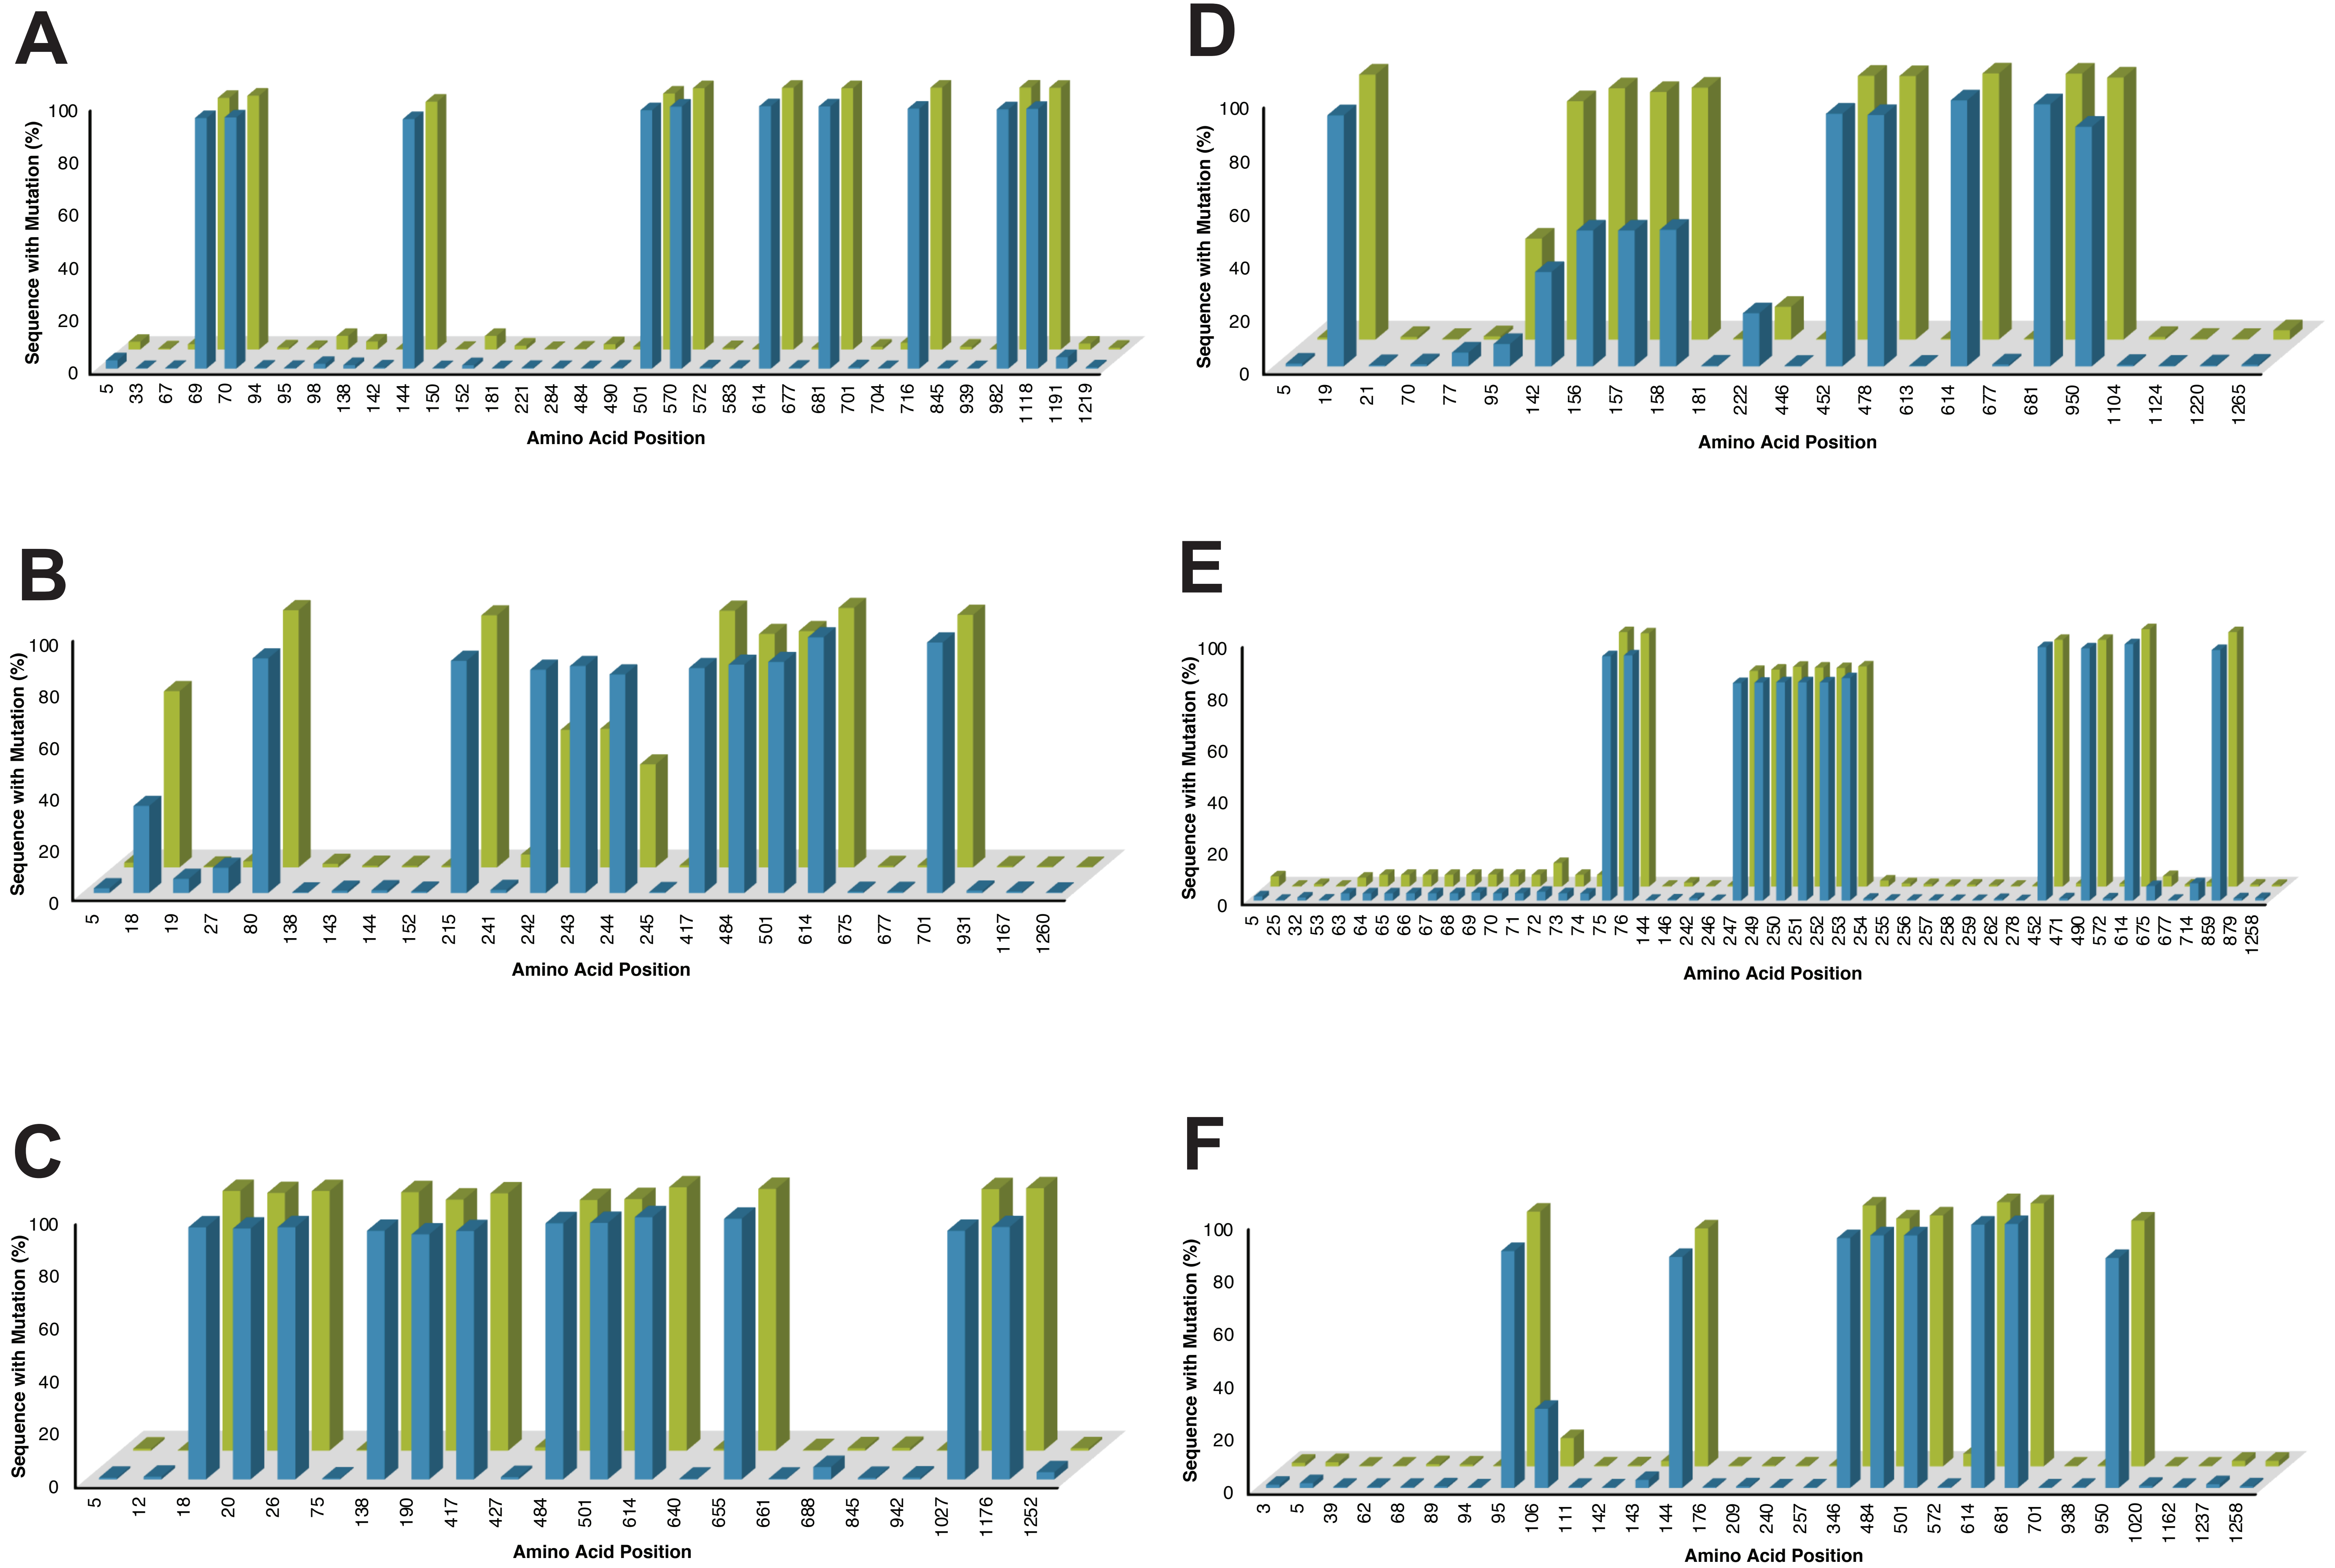

**G**

| Variant | Mutation Frequency (%) |       |        |     |
|---------|------------------------|-------|--------|-----|
|         | Early                  |       | Late   |     |
| Alpha   | D614G                  | 100   | S982A  | 100 |
|         | A570D                  | 100   | D614G  | 100 |
|         | P681H                  | 100   | D1118H | 100 |
|         | T716I                  | 100   | A570D  | 100 |
|         | S982A                  | 100   | T716I  | 100 |
| Beta    | D614G                  | 100   | D614G  | 100 |
|         | A701V                  | 100   | D80A   | 100 |
|         | D80A                   | 90    | K417N  | 100 |
|         | D215G                  | 90    | A701V  | 100 |
| Gamma   | N501Y                  | 90    | D215G  | 100 |
|         | D614G                  | 100   | D614G  | 100 |
|         | H655Y                  | 100   | V1176F | 100 |
|         | N501Y                  | 100   | H655Y  | 100 |
|         | E484K                  | 100   | T1027I | 100 |
| Delta   | V1176F                 | 100   | L18F   | 100 |
|         | D614G                  | 100   | D614G  | 100 |
|         | P681R                  | 100   | P681R  | 100 |
|         | L452R                  | 90    | T19R   | 100 |
|         | T478K                  | 90    | L452R  | 100 |
| Lambda  | T19R                   | 90    | T478K  | 100 |
|         | D614G                  | 100   | D614G  | 100 |
|         | L452Q                  | 100   | T859N  | 100 |
|         | F490S                  | 100   | L452Q  | 100 |
|         | T859N                  | 100   | F490S  | 100 |
| Mu      | T76I                   | 90    | G75V   | 90  |
|         | P681H                  | 100   | D614G  | 100 |
|         | D614G                  | 100   | P681H  | 100 |
|         | E484K                  | 100   | R346K  | 100 |
|         | N501Y                  | 100   | T95I   | 100 |
| R346K   | 90                     | N501Y | 90     |     |

**Supplementary Figure 6** Frequency of Spike Protein Mutations. Point mutations with frequencies greater than or equal to 0.2% and less than or equal to 100% were plotted based on the location of each mutation across the Spike protein amino acid sequences of the Alpha (A), Beta (B), Gamma (C), Delta (D), Lambda (E), and Mu (F) SARS-CoV-2 variants. The most frequent mutations were selected for each variant (G). Data shown are both from the early (■, March 01, 2021 – April 30, 2021) and late (■, July 01, 2021 – August 31, 2021) time points.

**A**

| BA.1    |              |         |               |
|---------|--------------|---------|---------------|
| Protein | Mutation     | Protein | Mutation      |
| Spike   | <b>A67V</b>  | N       | <b>P13L</b>   |
| Spike   | <b>H69-</b>  | N       | <b>E31-</b>   |
| Spike   | <b>V70-</b>  | N       | <b>R32-</b>   |
| Spike   | <b>T95I</b>  | N       | <b>S33-</b>   |
| Spike   | <b>G142-</b> | N       | <b>R203K</b>  |
| Spike   | <b>V143-</b> | N       | <b>G204R</b>  |
| Spike   | <b>Y144-</b> | ORF1a   | <b>K856R</b>  |
| Spike   | <b>Y145D</b> | ORF1a   | <b>S2083-</b> |
| Spike   | <b>N211-</b> | ORF1a   | <b>L2084I</b> |
| Spike   | <b>L212I</b> | ORF1a   | <b>A2710T</b> |
| Spike   | <b>G339D</b> | ORF1a   | <b>T3255I</b> |
| Spike   | <b>S371L</b> | ORF1a   | <b>P3395H</b> |
| Spike   | <b>S373P</b> | ORF1a   | <b>L3674-</b> |
| Spike   | <b>S375F</b> | ORF1a   | <b>S3675-</b> |
| Spike   | <b>K417N</b> | ORF1a   | <b>G3676-</b> |
| Spike   | <b>N440K</b> | ORF1a   | <b>I3758V</b> |
| Spike   | <b>G446S</b> | ORF1b   | <b>P314L</b>  |
| Spike   | <b>S477N</b> | ORF1b   | <b>I1566V</b> |
| Spike   | <b>T478K</b> | ORF9b   | <b>P10S</b>   |
| Spike   | <b>E484A</b> | ORF9b   | <b>E27-</b>   |
| Spike   | <b>Q493R</b> | ORF9b   | <b>N28-</b>   |
| Spike   | <b>G496S</b> | ORF9b   | <b>A29-</b>   |
| Spike   | <b>Q498R</b> | E       | <b>T9I</b>    |
| Spike   | <b>N501Y</b> | M       | <b>D3G</b>    |
| Spike   | <b>Y505H</b> | M       | <b>Q19E</b>   |
| Spike   | <b>T547K</b> | M       | <b>A63T</b>   |
| Spike   | <b>G614G</b> |         |               |
| Spike   | <b>H655Y</b> |         |               |
| Spike   | <b>N679K</b> |         |               |
| Spike   | <b>P681H</b> |         |               |
| Spike   | <b>N764K</b> |         |               |
| Spike   | <b>D796Y</b> |         |               |
| Spike   | <b>N856K</b> |         |               |
| Spike   | <b>Q954H</b> |         |               |
| Spike   | <b>N969K</b> |         |               |
| Spike   | <b>L981F</b> |         |               |

**B**

| BA.2    |              |         |               |
|---------|--------------|---------|---------------|
| Protein | Mutation     | Protein | Mutation      |
| Spike   | <b>T19II</b> | N       | <b>P13L</b>   |
| Spike   | <b>L24-</b>  | N       | <b>E31-</b>   |
| Spike   | <b>P25-</b>  | N       | <b>R32-</b>   |
| Spike   | <b>P26-</b>  | N       | <b>S33-</b>   |
| Spike   | <b>G142D</b> | N       | <b>R203K</b>  |
| Spike   | <b>V213G</b> | N       | <b>G204R</b>  |
| Spike   | <b>G339D</b> | N       | <b>S413R</b>  |
| Spike   | <b>S371F</b> | ORF1a   | <b>S135R</b>  |
| Spike   | <b>S373P</b> | ORF1a   | <b>T842I</b>  |
| Spike   | <b>S375F</b> | ORF1a   | <b>G1307S</b> |
| Spike   | <b>T376A</b> | ORF1a   | <b>L3027F</b> |
| Spike   | <b>D405N</b> | ORF1a   | <b>T3090I</b> |
| Spike   | <b>R408S</b> | ORF1a   | <b>L3201F</b> |
| Spike   | <b>K417N</b> | ORF1a   | <b>T3255I</b> |
| Spike   | <b>N440K</b> | ORF1a   | <b>P3395H</b> |
| Spike   | <b>S477N</b> | ORF1a   | <b>S3675-</b> |
| Spike   | <b>T478K</b> | ORF1a   | <b>G3676-</b> |
| Spike   | <b>E484A</b> | ORF1a   | <b>F3677-</b> |
| Spike   | <b>Q493R</b> | ORF1b   | <b>P314L</b>  |
| Spike   | <b>Q498R</b> | ORF1b   | <b>R1315C</b> |
| Spike   | <b>N501Y</b> | ORF1b   | <b>I1566V</b> |
| Spike   | <b>Y505H</b> | ORF1b   | <b>T2163I</b> |
| Spike   | <b>D614G</b> | ORF3a   | <b>T233I</b>  |
| Spike   | <b>H655Y</b> | ORF6    | <b>D61L</b>   |
| Spike   | <b>N679K</b> | E       | <b>T9I</b>    |
| Spike   | <b>P681H</b> | M       | <b>Q19E</b>   |
| Spike   | <b>N764K</b> | M       | <b>A63T</b>   |
| Spike   | <b>D796Y</b> |         |               |
| Spike   | <b>Q954H</b> |         |               |
| Spike   | <b>N969K</b> |         |               |

**Supplementary Figure 7** Defining mutations of the Omicron variant. As of writing, the Omicron variant has rapidly taken over the Delta variant all over the world. This variant has already split into two sublineages. The tables show the defining mutations for sublineage BA.1 (A) and BA.2 (B), which were derived from the CoVariants database.

**A**

| ORF3a    |                               |
|----------|-------------------------------|
| Mutation | Effect on Secondary Structure |
| T223I    | No structural damage          |

**B**

| ORF6     |                               |
|----------|-------------------------------|
| Mutation | Effect on Secondary Structure |
| D61L     | -                             |

**C**

| ORF9b    |                               |
|----------|-------------------------------|
| Mutation | Effect on Secondary Structure |
| P10S     | -                             |
| E27-     | -                             |
| N28-     | -                             |
| A29-     | -                             |

**D**

| Spike    |                                                   |          |                               |
|----------|---------------------------------------------------|----------|-------------------------------|
| Mutation | Effect on Secondary Structure                     | Mutation | Effect on Secondary Structure |
| T19I     | No structural damage                              | K417N    | No structural damage          |
| L24-     | -                                                 | N440K    | No structural damage          |
| P25-     | -                                                 | G446S    | No structural damage          |
| P26-     | -                                                 | S477N    | No structural damage          |
| A67V     | No structural damage                              | T478K    | No structural damage          |
| T95I     | Buried H-bond breakage                            | E484A    | No structural damage          |
| G142D    | Buried charge introduced, Buried glycine replaced | Q493R    | No structural damage          |
| G142-    | -                                                 | G496S    | No structural damage          |
| V143-    | -                                                 | Q498R    | No structural damage          |
| Y144-    | -                                                 | N501Y    | No structural damage          |
| Y145D    | No structural damage                              | Y505H    | No structural damage          |
| N211-    | -                                                 | T547K    | No structural damage          |
| L212I    | No structural damage                              | D614G    | No structural damage          |
| V213G    | No structural damage                              | H655Y    | No structural damage          |
| G339D    | No structural damage                              | N679K    | No structural damage          |
| S371F    | No structural damage                              | P681H    | No structural damage          |
| S371L    | No structural damage                              | N764K    | No structural damage          |
| S373P    | Disallowed phi/psi                                | D796Y    | No structural damage          |
| S375F    | No structural damage                              | N856K    | No structural damage          |
| T376A    | No structural damage                              | Q954H    | No structural damage          |
| D405N    | No structural damage                              | N969K    | No structural damage          |
| R408S    | No structural damage                              | L981F    | No structural damage          |

**Supplementary Figure 8** Effects of Accessory and Spike Protein Mutations of the Omicron variant on Secondary Structure. The structural consequences of each point mutation of the corresponding accessory and Spike protein were determined using the Missense3D software. Each table represents an accessory or Spike protein and the selected point mutations for the Omicron variant.



**A**

| ORF3a              |  |
|--------------------|--|
| Frequent Mutations |  |
| T223I              |  |

**B**

| ORF6               |  |
|--------------------|--|
| Frequent Mutations |  |
| D61L               |  |

**C**

| ORF9b              |  |
|--------------------|--|
| Frequent Mutations |  |
| P10S               |  |
| E27-               |  |
| N28-               |  |
| A29-               |  |

**D**

| Spike              |       |
|--------------------|-------|
| Frequent Mutations |       |
|                    | T478K |
|                    | E484A |
|                    | Q493R |
|                    | G496S |
|                    | Q498R |
|                    | N501Y |
|                    | Y505H |
|                    | D614G |
|                    | H655Y |
|                    | N679K |
|                    | P681H |
|                    | D796Y |
|                    | Q954H |
|                    | L981F |
|                    | R408S |
|                    | K417N |
|                    | N440K |
|                    | G446S |
|                    | S477N |
|                    | A67V  |
|                    | T19I  |
|                    | T95I  |
|                    | G142D |
|                    | Y145D |
|                    | L212I |
|                    | V213G |
|                    | G339D |
|                    | S371F |
|                    | S371L |
| T547K              | S373P |
| N764K              | S375F |
| N856K              | T376A |
| N969K              | D405N |

**Supplementary Figure 9** Effects of Accessory and Spike Protein Mutations of the Omicron variant on Biologic Function. The functional consequences of each point mutation in the corresponding accessory and Spike protein were determined using the PROVEAN software. Each table (A-D) represents an accessory protein or Spike protein and the selected point mutations for the Omicron variant. The effect on biologic function was classified into loss-of-function (■) and neutral (□) mutations.
